# Supplementary material for: Preparation of an ion imprinted functionalized mesoporous silica for rapid and specific absorption Cr(iii) ions in effluents
Source: Royal Society of Chemistry journal article supplement (doi:10.1039/c7ra05386j), 2017-01-01
Supplement: c7ra05386j1.pdf [file c7ra05386j1.pdf]

# Preparation of an ion imprinted functionalized mesoporous silica for rapid and specific absorption Cr (III) ions in the effluents

Shuibin Cen,<sup>a</sup> Weiming Li,<sup>c</sup> Rong He<sup>d</sup>, Jiean Tan<sup>e</sup>, Haishui Wang,<sup>\*a</sup>

Chaohai Wei<sup>b</sup> and Youwen Tang<sup>\*e</sup>

<sup>a</sup>School of Chemistry and Chemical Engineering, South China University of Technology, Guangzhou 510641, China. Email: wanghsh@scut.edu.cn.

<sup>b</sup>The Key Lab of Pollution Control and Ecosystem Restoration in Industry Clusters, Ministry of Education, South China University of Technology, Guangzhou, China.

<sup>c</sup>Technical Service Center Laboratory of Panyu Entry-Exit Inspection & Quarantine Bureau, Guangzhou, China.

<sup>d</sup>Guangzhou Center for Disease Control and Prevention, Guangzhou 510440, China.

<sup>e</sup>MOE Key Laboratory of Laser Life Science, School of Chemistry and Environment, South China Normal University, 510631, Guangzhou, China. Email: tanglab@scnu.edu.cn.

## Supplementary information

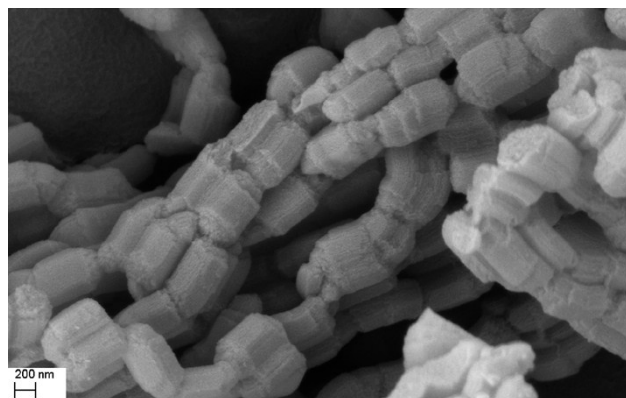

Fig. S1 SEM image of NIMS

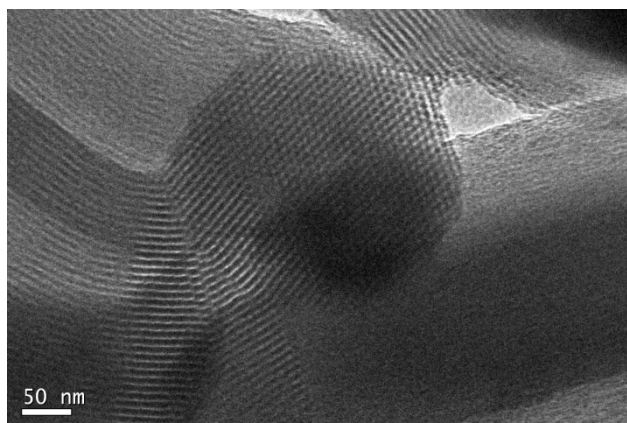

Fig. S2 TEM image of NIMS

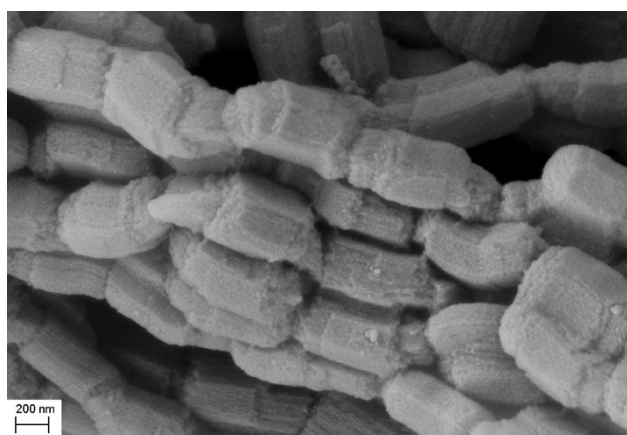

Fig. S3 SEM image of SBA-15

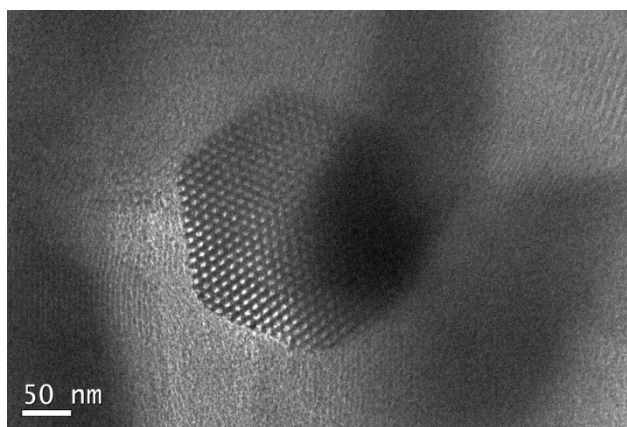

Fig. S4 TEM image of SBA-15
